# Supplementary material for: Genetic Manipulation of the Brassicaceae Smut Fungus Thecaphora thlaspeos
Source: MDPI journal article supplement (doi:10.3390/jof7010038), 2021-01-09
Supplement: s1 [file s1]

## Protocol S1

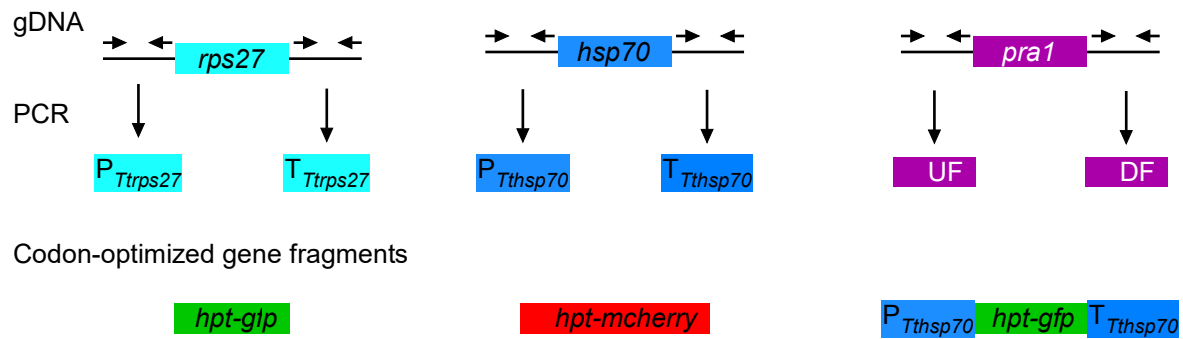

**Protocol S1: Golden-Gate assembly of constructs.** Exemplarily, the cloning strategy for three constructs is shown. For the reporter constructs, endogenous regulatory sequences were amplified by PCR from genomic DNA extracted from *T. thlaspeos* LF1 1 kb upstream and downstream of the highly expressed genes *hsp70* (THTG\_01007) and *rps27* (THTG\_04331). Codon-optimized *hpt-gfp* and *hpt-mcherry* fusion constructs were ordered as gene fragments from IDT, Leuven, Belgium. Plasmids were assembled into a destination vector using Golden-Gate Cloning. For the *pra1* deletion construct, the hpt-gfp-resistance cassette from pUMa2792 was used. 1 kb flanking sequences of *pra1* (THTG\_02790) were amplified for homologous recombination. The flanks and the resistance-fusion cassette were assembled by Golden-Gate cloning.
