# Supplementary material for: Genetic Manipulation of the Brassicaceae Smut Fungus Thecaphora thlaspeos
Source: MDPI journal article supplement (doi:10.3390/jof7010038), 2021-01-09
Supplement: s1 [file s1]

**Figure S3**

|            |             |             |                 |             |              |            |        |     |
|------------|-------------|-------------|-----------------|-------------|--------------|------------|--------|-----|
| UmSDH2 sen | MSLFNVSNGL  | RTALRPSVAS  | S - - - - SRVAA | FSTTAAARLA  | TPTSD - NVGS | SGKPQHLKQF | KIYRW  | 60  |
| UmSDH2 res | .....       | .....       | .....           | .....       | .....        | .....      | .....  | 60  |
| THTG_04978 | .....-AG.T. | .A.VQ.V.SG  | .RSSIA.T..      | .....L.Q..  | .....S.....  | .....K..A. | .....  | 64  |
| UmSDH2 sen | NPDKPSEKPR  | LQSYTLDLNQ  | TGPMVLDALI      | KIKNEIDPTL  | TFRRSCREGI   | CGSCAMNIDG | VNTLA  | 125 |
| UmSDH2 res | .....       | .....       | .....           | .....       | .....        | .....      | .....  | 125 |
| THTG_04978 | .....A..... | ..T.....    | .....V..S.      | .....       | .....        | .....      | .....  | 129 |
| UmSDH2 sen | CLCRIDKQND  | TKIYPLPHMY  | IVKDLVPDLT      | QFYKQYRSIE  | PFLKSNNTPS   | EGEHLQSPEE | RRRLD  | 190 |
| UmSDH2 res | .....       | .....       | .....           | .....       | .....        | .....      | .....  | 190 |
| THTG_04978 | .....REKE   | S.....      | V.....          | .....       | .....K.P.A   | Q.....     | .....  | 194 |
| UmSDH2 sen | GLYECILCAC  | CSTSCPSYWW  | NQDEYLGPAV      | LMQAYRWMAD  | SRDDFGEERR   | QKLENTFSLY | RCHT   | 255 |
| UmSDH2 res | .....       | .....       | .....           | .....       | .....        | .....      | .....  | 255 |
| THTG_04978 | .....       | .....       | .....           | .....       | .....T...K   | T.....     | A..R.. | 259 |
| UmSDH2 sen | MNCsRtCPKN  | LNPGKAIAQI  | KKDMAVGAP -     | KASERPIMAS  | S 295        |            |        |     |
| UmSDH2 res | .....       | .....       | .....           | .....       | .....        |            |        | 295 |
| THTG_04978 | ...T.....S  | ...A.....T. | ...E.ST...A     | .STD.....P. | N 300        |            |        |     |

**Fig. S3: Sequence comparison of the succinate dehydrogenase.** *UmSdh2* (UMAG\_00844) exists in two isoforms that differ in only one amino acid (marked in grey). The carboxin-resistant version carries a leucine instead of a histidine in position 253 (Keon et al., 1991 [41]). *T. thlaspeos* has a homolog that has 82 % amino acid similarity, but has an arginine in the resistance-mediating position. This difference might explain the lower sensitivity against carboxin compared to *U. maydis*.
