# Supplementary material for: Genetic Manipulation of the Brassicaceae Smut Fungus Thecaphora thlaspeos
Source: MDPI journal article supplement (doi:10.3390/jof7010038), 2021-01-09
Supplement: s1 [file s1]

**Figure S4**

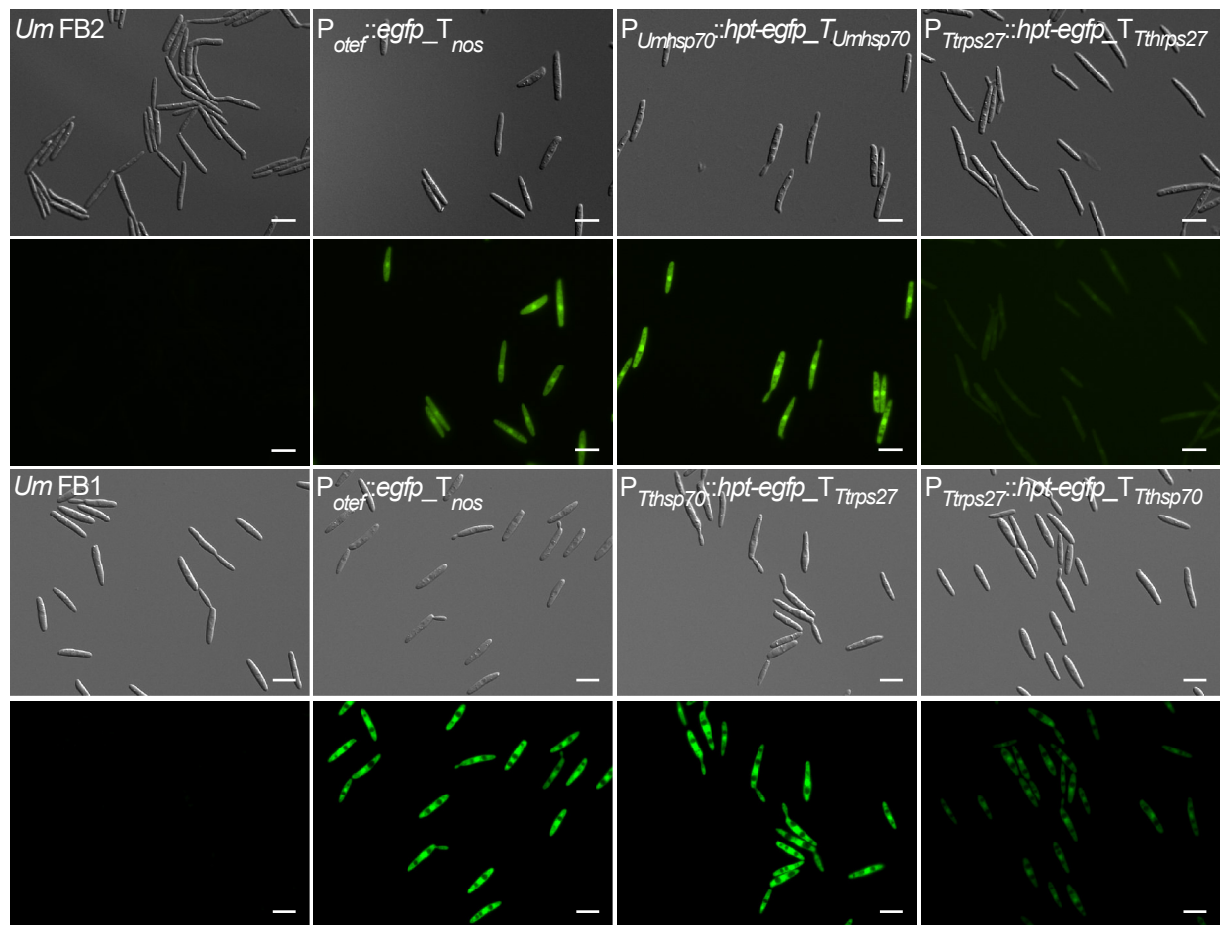

**Figure S4: Verification of resistance-reporter constructs in *U. maydis*.** Reporter constructs containing a fusion of hygromycin resistance (*hpt*) and the fluorescent marker *egfp* under the control of two candidate promoter regions derived from the *T. thlaspeos* genome were tested in *U. maydis* wild-type strains. Upon transformation of the linearized construct, it randomly integrates into the genome. Protein accumulation is visualized by green fluorescence. eGfp-fluorescence in the strains carrying the promoter of *Tthsp70* was stronger compared to the stably integrated construct under the control of a strong, synthetic promoter (*Poterf*). Expression under the promoter region of the ribosomal gene *rsp27* was weaker, but the cells still were resistant to hygromycin. This confirms that the fusion protein is active and both promoters can be used, albeit with different strength. Scale bar: 10  $\mu$ m.
