# Supplementary material for: Genetic Manipulation of the Brassicaceae Smut Fungus Thecaphora thlaspeos
Source: MDPI journal article supplement (doi:10.3390/jof7010038), 2021-01-09
Supplement: s1 [file s1]

1

2

**Table S2** Transformation constructs used for the generation of *T. thlaspeos* strains. \* indicates that the plasmid was part of the plasmid mix used in the first transformation.

| Vector    | Expression cassette |            |             |            |            |                          | Insertion locus | Selective marker | Enzyme  |
|-----------|---------------------|------------|-------------|------------|------------|--------------------------|-----------------|------------------|---------|
|           | Promoter            | ID         | Gene        | Terminator | ID         | 1 kb flanks              |                 |                  |         |
| pUMa2732* | Um Phsp70           | UMAG_03791 | hpt-gfp     | Um Thsp70  | UMAG_03791 | -                        | ectopic         | hygromycin       | SspI HF |
| pUMa2790* | Tt Phsp70           | THTG_01007 | hpt-gfp     | Tt Thsp70  | THTG_01007 | -                        | ectopic         | hygromycin       | SspI HF |
| pUMa2792* | Tt Prps27           | THTG_04331 | hpt-gfp     | Tt Trps27  | THTG_04331 | -                        | ectopic         | hygromycin       | SspI HF |
| pUMa3030* | Tt Phsp70           | THTG_01007 | hpt-gfp     | Tt Trps27  | THTG_04331 | -                        | ectopic         | hygromycin       | SspI HF |
| pUMa3031* | Tt Prps27           | THTG_04331 | hpt-gfp     | Tt Thsp70  | THTG_01007 | -                        | ectopic         | hygromycin       | SspI HF |
| pUMa3576  | Tt Phsp70           | THTG_01007 | hpt-mcherry | Tt Thsp70  | THTG_01007 | -                        | ectopic         | hygromycin       | SspI HF |
| pUMa3886  | Tt Phsp70           | THTG_01007 | hpt-gfp     | Tt Thsp70  | THTG_01007 | <i>pra1</i> (THTG 02790) | <i>pra1</i>     | hygromycin       | SspI HF |

3
