# Supplementary material for: Genetic Manipulation of the Brassicaceae Smut Fungus Thecaphora thlaspeos
Source: MDPI journal article supplement (doi:10.3390/jof7010038), 2021-01-09
Supplement: s1 [file s1]

**Table S1. Pilot study for protoplasting enzyme cocktail.** Various conditions for each enzyme combination were tested mostly in single replicates.

| Organism                   | Enzyme                                         | Buffer composition                                     | Temperature    | Incubation time    | Yield    | Reference                                 |
|----------------------------|------------------------------------------------|--------------------------------------------------------|----------------|--------------------|----------|-------------------------------------------|
| <i>U. maydis</i>           | 12,5 mg/mL Glucanex                            | 0,02 M citrat-Puffer, 1 M sorbitol                     | RT             | 2 h                | -        | Bösch et al 2016                          |
| <i>U. maydis</i>           | 100 mg/mL Glucanex                             | 0,02 M citrat-Puffer, 1 M sorbitol                     | RT             | 2 h                | -        | Bösch et al 2016                          |
| <i>U. maydis/ A. niger</i> | 20 mg/mL Glucanex<br>0,015 U/mL Chitinase      | 0,02 M citrat-Puffer, 1 M sorbitol                     | RT             | up to 20 h         | -        | Bösch et al 2016,<br>de Bekker et al 2009 |
| <i>U. maydis/ A. niger</i> | 20 mg/mL Glucanex<br>0,3 U/mL Chitinase        | 0,02 M citrat-Puffer, 1 M sorbitol                     | RT             | 2 h                | +/-      | Bösch et al 2016,<br>de Bekker et al 2009 |
| <i>S. indica</i>           | 20 mg/mL Glucanex                              | 0,02 M MES, 0,05 M CaCl <sub>2</sub> , 1,33 M sorbitol | RT, 28°C, 37°C | up to 5h           | -        | Zuccaro et al 2009                        |
| <i>S. indica</i>           | 100 mg/mL Glucanex                             | 0,02 M MES, 0,05 M CaCl <sub>2</sub> , 1,33 M sorbitol | RT, 28°C, 37°C | up to 5 h          | -        | Zuccaro et al 2009                        |
| <i>U. bromivora</i>        | 10 mg/mL Glucanex<br>5 mg/mL Yatalase          | 0,02 M MES, 1 M MgSO <sub>4</sub>                      | RT             | up to 1,5 h        | -        | Rabe et al 2016                           |
| <i>U. bromivora</i>        | <b>20 mg/mL Glucanex<br/>10 mg/mL Yatalase</b> | <b>0,02 M MES, 1 M MgSO<sub>4</sub></b>                | <b>RT</b>      | <b>up to 1,5 h</b> | <b>+</b> | <b>Rabe et al 2016</b>                    |
