# Supplementary material for: Genetic Manipulation of the Brassicaceae Smut Fungus Thecaphora thlaspeos
Source: MDPI journal article supplement (doi:10.3390/jof7010038), 2021-01-09
Supplement: s1 [file s1]

## Protocol S2

### Protoplasts of *Thecaphora thlaspeos*

- Inoculate 100 ml of YMPG to an OD<sub>600</sub> of 0,075 with exponentially growing *T. thlaspeos* culture in a 500 ml baffled flask
- Incubate 18°C, shaking at 200 rpm for 3-4 days until OD<sub>600</sub> reaches 0,6-0,8
- Harvest cells in a cell strainer (40 µm pore size)
- Wash with 20 ml citrate buffer
- Dissolve 20 mg/ml Glucanex and 10 mg/ml Yatalase in citrate buffer and filter-sterilize dissolved enzyme (9 ml enzyme solution /100 ml culture)
- Transfer the filaments into a 50 ml falcon tube and add 9 ml enzyme solution
- Incubate for 30-60 min at RT → formation of protoplasts is visible already after 10 min
- Add 15 ml of citrate buffer and aliquot in 15 ml falcon tubes, 6 ml each
- Overlay with 5 ml trapping buffer (keep everything on ice from now on)
- Spin 15 min 4°C 4863 g in a swing out rotor
- Collect interphases in a 50 ml falcon
- Mix at least with an equal volume of cold STC buffer
- Spin 10 min 4°C 4863 g in a swing out rotor
- Take off supernatant und re-suspend the pellet in 500µl cold STC buffer
- Prepare 100 µl aliquots in 2 ml reaction tubes
- Proceed with transformation immediately

### Transformation of *T. thlaspeos* protoplasts

- Prepare antibiotic bottom-plates (can be prepared the day before):
  - boil up YMPG-REG agar & cool down to 60°C
  - add antibiotic
  - pour 15 ml/plate
  - let it solidify
- Add 15 ml YMPG-REG without antibiotic (prior to transformation)
- Add 1 µl heparin in each transformation tube
- Add linearized DNA (5 µg)
- Incubate 10 min on ice
- Add 500 µl STC/PEG (mix gently)
- Incubate 15 min on ice
- Disperse your transformation on 2 YMPG-REG plates and streak out gently!
- Incubate RT (18°C), wrap with parafilm once they are dry (usually 24 h later)

## Media & solutions

### YEPSlight

800 ml

|                                    |       |
|------------------------------------|-------|
| 1.0 % (w/v) Yeast-Extract (Difco)  | 8.0 g |
| 0.4 % (w/v) Bacto™-Peptone (Difco) | 3.2 g |
| 0.4 % (w/v) sucrose                | 3.2 g |

- Dissolve in MilliQ water, aliquot and autoclave for 5 min at 121 ° C

### 1x citrate buffer

500 ml

|        |                                       |          |
|--------|---------------------------------------|----------|
| 0.1 M  | trisodium citrate 2x H <sub>2</sub> O | 14.75 g  |
| 0.01 M | EDTA (0.5M Stock)                     | 10.00 ml |
| 1.2 M  | MgSO <sub>4</sub> 7x H <sub>2</sub> O | 97.88 g  |

- Dissolve citrate and MgSO<sub>4</sub> in MilliQ H<sub>2</sub>O
- Then adjust pH to 5,8 with citric acid solution
- Fill up to 490 ml with MilliQ H<sub>2</sub>O
- Add EDTA
- Autoclave for 5 min at 121 ° C or filter sterilize

### 1x Citric acid solution

200 ml

|       |                                       |         |
|-------|---------------------------------------|---------|
| 0.1 M | citric acid                           | 4.20 g  |
| 1.2 M | MgSO <sub>4</sub> 7x H <sub>2</sub> O | 29.58 g |

### Trapping buffer

500 ml

|                                 |          |
|---------------------------------|----------|
| 0.6M sorbitol                   | 54.65 g  |
| 0.1M Tris/HCl (1M Tris/HCl pH7) | 50.00 ml |

### YMPG-REG

800 ml

|                                   |         |
|-----------------------------------|---------|
| 0.3 % (w/v) Yeast-Extract (Difco) | 2.4 g   |
| 0.3 % (w/v) Malzextrakt           | 2.4 g   |
| 0.5 % (w/v) Bacto™-Pepton (Difco) | 4.0 g   |
| 1.0 % (w/v) Glucose               | 8.0 g   |
| 1.0 M sucrose                     | 273.8 g |

- In MilliQ water
- Solid medium:
  - + 1.0 % phytagel (4,0 g for 400 ml) or
  - + 0.6 % plant agar (2,4 g for 400 ml)
- Aliquot and autoclave for 5 min at 121 °C.
