# Supplementary material for: Genetic Manipulation of the Brassicaceae Smut Fungus Thecaphora thlaspeos
Source: MDPI journal article supplement (doi:10.3390/jof7010038), 2021-01-09
Supplement: s1 [file s1]

**Figure S2**

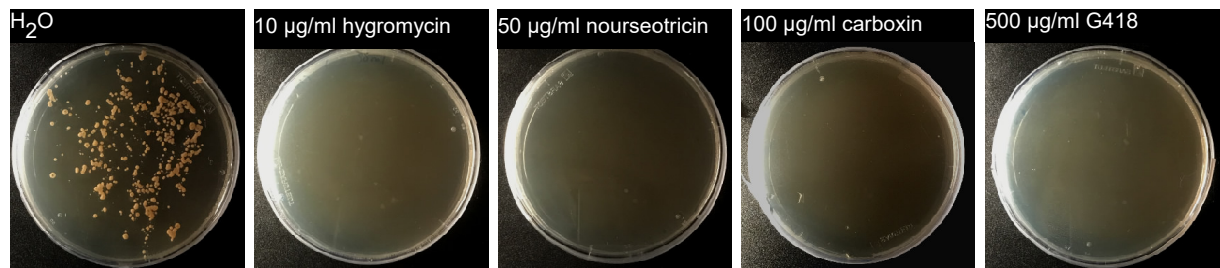

**Figure S2: Sensitivity of *T. thlaspeos* towards different antibiotics.** LF1 was grown on YL 0.6% plant agar plates with and without antibiotics for 16 days. For hygromycin and nourseotricin dilution series were tested and 10  $\mu g$  hygromycin and 50  $\mu g$  nourseotricin were identified as minimal inhibitory concentrations to prevent growth. Carboxin inhibits growth at 100  $\mu g/ml$  and G418 at 500  $\mu g/ml$ . Both can be used to establish additional resistance markers.
