# Supplementary material for: Genetic Manipulation of the Brassicaceae Smut Fungus Thecaphora thlaspeos
Source: MDPI journal article supplement (doi:10.3390/jof7010038), 2021-01-09
Supplement: s1 [file s1]

Figure S1

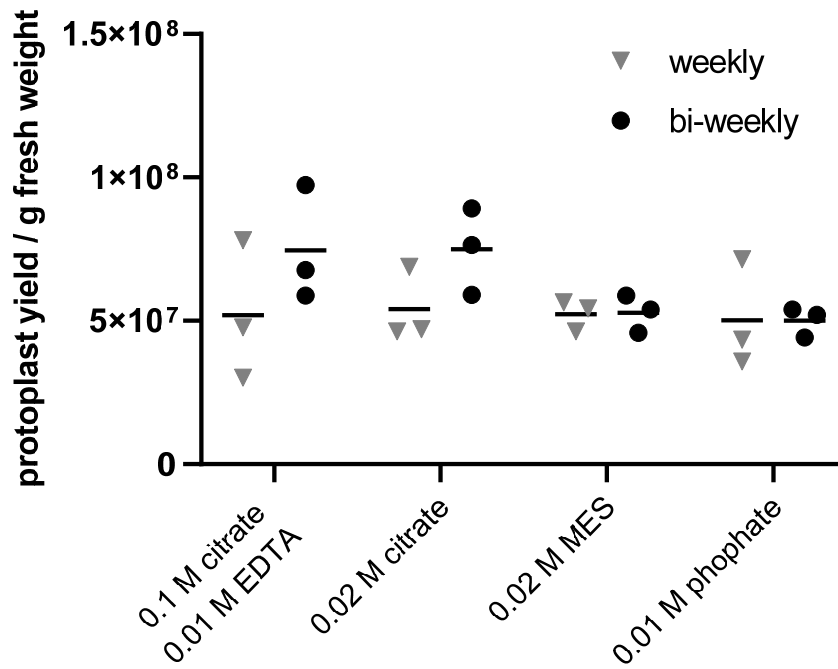

**Fig. S1: Protoplast yields in different buffers are influenced by the sub-culturing scheme.** *T. thlaspeos* LF1 cultures were grown to an OD<sub>600</sub><0.8 in an either weekly or bi-weekly splitting rhythm. To test protoplasting efficiency, hyphae were filtered and incubated in different buffers all supplemented with 1.2 M MgSO<sub>4</sub> and 10 mg/ml Yatalase + 20 mg/ml Glucanex for 60 mins at RT. There are no significant differences between buffers or splitting rhythm of the culture, but cells sub-cultured bi-weekly yield more protoplasts in citrate buffers.
