# Supplementary material for: Genetic Manipulation of the Brassicaceae Smut Fungus Thecaphora thlaspeos
Source: J Fungi (Basel). 2021 Jan 9;7(1):38. doi: 10.3390/jof7010038 (PMC7826943; doi:10.3390/jof7010038)
Supplement: Supplementary file 1 [file jof-07-00038-s001.zip]

Archive with 11 entries (11 files):
- Supplementary Files_proofs/FigS1_buffer_comparison.pdf
- Supplementary Files_proofs/FigS2_antibiotics.pdf
- Supplementary Files_proofs/FigS3_cbx_alignment.pdf
- Supplementary Files_proofs/FigS4_transformation_constructs_in_U_maydis.pdf
- Supplementary Files_proofs/FigS5_strain_confirmation.pdf
- Supplementary Files_proofs/Protocol S1 plasmid maps.pdf
- Supplementary Files_proofs/Protocol S2_Protoplasts and transformation of Thecaphora thlaspeos.pdf
- Supplementary Files_proofs/Tab_S1_protoplasting_pilot.pdf
- Supplementary Files_proofs/Tab_S2_transformation_constructs_VG.pdf
- Supplementary Files_proofs/Video S1_LF1+LF2_confrontation_experiment.mp4
- Supplementary Files_proofs/Video S2__LF2+LF1-pra1D_confrontation experiment.mp4
